# Supplementary material for: Theoretical analysis and evaluation of reaction routes by “three-parameter difference”
Source: Royal Society of Chemistry journal article supplement (doi:10.1039/d2ra01320g), 2022-01-01
Supplement: d2ra01320g1.pdf [file d2ra01320g1.pdf]

## Supporting Information

### Theoretical analysis and evaluation of reaction routes by the "three-parameter difference"

Yu-Cong Song, Xiao-Shu Ding\*, Chang-Cheng Wu, Yan-Ji Wang\*

*Tianjin Key Laboratory of Inherent Safety Chemical Process, School of Chemical  
Engineering, Hebei University of Technology, Tianjin 300130, China*

\*Corresponding authors.

*E-mail addresses:* yjwang@hebut.edu.cn (Y. Wang), dxshu@hebut.edu.cn (X. Ding).

## Calculation details of parameters

(1) The reaction thermodynamics was computed by Aspen Plus software. The physical properties of substances not in the database were estimated by molecular structure, and the Gibbs free energy was calculated by the Equilibrium Reactor (REquil) module.

(2) The atom utilization (AU) is usually used to measure the atom economy of the chemical reaction process. Atomic utilization is the ratio of the sum of the atomic masses of the products to the sum of the atomic masses of all the reactants. It can be calculated by the following formula. The larger the AU, the fewer by-products. It does not refer to product selectivity but atom selectivity.

$$AU = \frac{v_i M_i}{\sum_{j=1}^N v_j M_j}$$

In the formula,  $v_i$  is the stoichiometric coefficient of the target product  $i$ ;  $M_i$  is the molar mass of the target product  $i$ ;  $v_j$  and  $M_j$  ( $j = 1, 2, \dots, N$ ) are the stoichiometric coefficient and molar mass of reactant  $j$ , respectively.

(3) The inherent safety was evaluated by the I-safe index method, which centers on the material properties and considers the basic reaction process conditions. Moreover, since this method requires less process information, it is particularly suitable for screening the reaction routes in the preliminary process design stage. The total index is divided into chemical and process inherent safety index. The previous is formed of subindices for reaction heats, flammability, explosiveness and toxicity. The latter is formed of subindices for process temperature, pressure and the safety of equipment and process structure. With reference to the definition of OSI, it is assumed that OSI' is the overall safety index of a reaction, which is used to reflect the safety of the reaction. The sub-indices (including the material safety index) and its value method are shown in the following table:

| Symbol | Meaning                   | Calculation method  |
|--------|---------------------------|---------------------|
| ICI    | Individual Chemical Index | $Nr + Nf + Nt + Ne$ |
| IRI    | Individual Reaction Index | $Rt + Rp + Ry + Rh$ |
| OSI'   | Individual Safety Index   | $\sum(ICI + IRI)$   |
| OCI    | Overall Chemical Index    | $\max(ICI)$         |
| ORI    | Overall Reaction Index    | $\sum IRI$          |
| OSI    | Overall Safety Index      | $\sum(OCI + ORI)$   |

Notes: Nr: NFPA reactivity rating; Nf: Flammability; Nt: Toxicity;  
 Ne: Explosiveness; Rt: Temperature subindex; Rp: Pressure subindex;  
 Ry: Yield subindex; Rh: Heat of reaction subindex.

(4) According to the Gibbs free energy, atom utilization and inherent safety index of each reaction obtained above, the  $\Delta R_i$  of was calculated according to the definition of "three-parameter difference".

Table S1 Material safety index of each reaction in the synthesis of DMC

| Materials               | Molecular formula                             | Nr | Flash point /°C | Nf | TLV /ppm | Nt | Explosiveness vol%   | Ne |
|-------------------------|-----------------------------------------------|----|-----------------|----|----------|----|----------------------|----|
| Methanol                | CH <sub>3</sub> OH                            | 0  | 12              | 3  | 200      | 2  | 6~36.5               | 2  |
| Phosgene                | COCl <sub>2</sub>                             | 1  | —               | 0  | 0.1      | 6  | —                    | 0  |
| Dimethyl carbonate      | C <sub>3</sub> H <sub>6</sub> O <sub>3</sub>  | 1  | 17              | 3  |          | 1  | 4.22~12.87           | 1  |
| Hydrochloric acid       | HCl                                           | 0  | —               | 0  | 2        | 4  | —                    | 0  |
| Ethylene carbonate      | C <sub>3</sub> H <sub>4</sub> O <sub>3</sub>  | 0  | 143             | 1  |          | 1  | 3.6~16.1             | 1  |
| Ethylene glycol         | (CH <sub>2</sub> OH) <sub>2</sub>             | 0  | 111             | 1  | 25       | 3  | 3.2~15.3             | 1  |
| Propylene carbonate     | C <sub>4</sub> H <sub>6</sub> O <sub>3</sub>  | 0  | 135             | 1  |          | 1  | 1.8~14.3             | 1  |
| Propylene Glycol        | C <sub>3</sub> H <sub>8</sub> O <sub>2</sub>  | 0  | 99              | 1  | 150      | 2  | 2.6~12.6             | 1  |
| Carbon monoxide         | CO                                            | 0  | -50             | 4  | 25       | 3  | 12.5~74.2            | 4  |
| Oxygen                  | O <sub>2</sub>                                | 0  | —               | 0  | —        | 0  | —                    | 0  |
| Water                   | H <sub>2</sub> O                              | 0  | —               | 0  | —        | 0  | —                    | 0  |
| Methyl nitrite          | CH <sub>3</sub> NO <sub>2</sub>               | 4  | —               | 4  | 64.6     | 3  | 4.7-100 <sup>2</sup> | 4  |
| Nitric oxide            | NO                                            | 0  | —               | 0  | 25       | 3  | —                    | 0  |
| Urea                    | CON <sub>2</sub> H <sub>4</sub>               | 0  | —               | 0  |          | 2  | —                    | 0  |
| Ammonia                 | NH <sub>3</sub>                               | 0  | —               | 4  | 25       | 3  | 15.7~25              | 2  |
| Carbon dioxide          | CO <sub>2</sub>                               | 0  | —               | 0  | 5000     | 1  | —                    | 0  |
| Propylene oxide         | C <sub>3</sub> H <sub>6</sub> O               | 2  | -37             | 4  | 2        | 4  | 1.9~36.3             | 2  |
| Glycerol                | C <sub>3</sub> H <sub>8</sub> O <sub>3</sub>  | 0  | 199             | 1  | 10000    | 1  | 2.6~11.3             | 1  |
| Cuprous chloride        | CuCl                                          | 0  | 1490            | 1  |          | 1  | —                    | 0  |
| Methoxy copper chloride | Cu(OCH <sub>3</sub> )Cl                       | 0  | —               | 1  |          | 1  | —                    | 0  |
| Ethylene oxide          | C <sub>2</sub> H <sub>4</sub> O               | 3  | -17.8           | 4  |          | 2  | 3~100                | 4  |
| Cyclohexene oxide       | C <sub>6</sub> H <sub>10</sub> O              | 3  | 27.2            | 2  |          | 2  | 1.15~12.36           | 1  |
| Cyclohexanediol         | C <sub>6</sub> H <sub>12</sub> O <sub>2</sub> | 0  | 114.3           | 1  |          | 1  | —                    | 0  |
| Cyclohexenyl carbonate  | C <sub>7</sub> H <sub>10</sub> O <sub>3</sub> | 0  |                 | 0  |          | 1  | —                    | 0  |

Table S2 Safety index of each reaction for DMC synthesis

| Reactions | Temperature /°C | Rt | Pressure /bar | Rp | Yield/ % | Ry | Reaction heat /(J/g) | Rh |
|-----------|-----------------|----|---------------|----|----------|----|----------------------|----|
| R1        | 100             | 1  | 1             | 0  | 99       | 1  | 882.72               | 2  |
| R2        | 70~150          | 1  | 5~25          | 1  | 90~99    | 1  | 1380.98              | 3  |
| R3        | 150~300         | 2  | 25~50         | 2  | 90~99    | 1  | 41.08                | 0  |
| R4        | 150~300         | 2  | 25~50         | 2  | 90~99    | 1  | 116.80               | 0  |
| R5        | 150~300         | 2  | 25~50         | 2  | 90~99    | 1  | 517.25               | 1  |
| R6-1      | 160             | 2  | 30            | 2  | 99       | 1  | 682.59               | 2  |
| R6-2      | 100             | 1  | 7             | 1  | 24       | 8  | 159.91               | 0  |
| R7-1      | 150~185         | 2  | 105           | 3  | 95       | 1  | 931.84               | 2  |
| R7-2      | 65              | 0  | 1             | 0  | 80       | 2  | 143.83               | 0  |
| R8-1      | 150~300         | 2  | 25~50         | 2  | 90~99    | 1  | 599.66               | 1  |
| R8-2      | 70~150          | 1  | 5~25          | 1  | 90~99    | 1  | 937.29               | 2  |
| R9-1      | 100             | 1  | 1             | 0  | 90       | 1  | 608.99               | 2  |
| R9-2      | 100             | 1  | 1             | 0  | 92       | 1  | 855.94               | 2  |
| R10-1     | 70~150          | 1  | 5~25          | 1  | 90~99    | 1  | 43.64                | 0  |

Table S3 Inherent safety index of reactions for DMC synthesis from methanol

as the initial raw material

| Index    | R1 | R2 | R3 | R4 | R5 |
|----------|----|----|----|----|----|
| Rt       | 1  | 1  | 1  | 1  | 1  |
| Rp       | 0  | 1  | 1  | 1  | 1  |
| Ry       | 1  | 1  | 1  | 1  | 1  |
| Rh       | 2  | 3  | 0  | 0  | 1  |
| IRI      | 4  | 6  | 3  | 3  | 4  |
| max (Nr) | 1  | 1  | 1  | 1  | 2  |
| max (Nf) | 3  | 4  | 4  | 3  | 4  |
| max (Nt) | 6  | 3  | 3  | 2  | 4  |
| max (Ne) | 2  | 4  | 2  | 2  | 2  |
| ICI      | 12 | 12 | 10 | 8  | 12 |
| OSI'     | 16 | 18 | 13 | 11 | 16 |
| OCI      | 12 | 12 | 10 | 8  | 12 |
| ORI      | 4  | 6  | 3  | 3  | 4  |
| OSI      | 16 | 18 | 13 | 11 | 16 |

Table S4 Inherent safety index of transesterification with different epoxides as raw materials

| Index    | R6-1 | R6-2 | R7-1 | R7-2 | R8-1 | R8-2 |
|----------|------|------|------|------|------|------|
| Rt       | 2    | 1    | 2    | 0    | 1    | 1    |
| Rp       | 2    | 1    | 3    | 0    | 1    | 1    |
| Ry       | 1    | 8    | 1    | 2    | 1    | 1    |
| Rh       | 2    | 0    | 2    | 0    | 2    | 2    |
| IRI      | 7    | 10   | 8    | 2    | 5    | 5    |
| max (Nr) | 3    | 1    | 2    | 1    | 3    | 1    |
| max (Nf) | 4    | 3    | 4    | 3    | 2    | 3    |
| max (Nt) | 2    | 3    | 4    | 2    | 2    | 2    |
| max (Ne) | 4    | 2    | 2    | 2    | 1    | 2    |
| ICI      | 13   | 9    | 12   | 8    | 8    | 8    |
| OSI'     | 20   | 19   | 20   | 10   | 13   | 13   |
| OCI      | 13   |      | 12   |      | 8    |      |
| ORI      | 17   |      | 10   |      | 10   |      |
| OSI      | 30   |      | 22   |      | 18   |      |

Table S5 Inherent safety index of oxidative carbonylation of methanol to DMC

| Index    | R9-1 | R9-2 | R2 |
|----------|------|------|----|
| Rt       | 1    | 1    | 1  |
| Rp       | 0    | 0    | 1  |
| Ry       | 1    | 1    | 1  |
| Rh       | 2    | 2    | 3  |
| IRI      | 4    | 4    | 6  |
| max (Nr) | 4    | 4    | 1  |
| max (Nf) | 4    | 4    | 4  |
| max (Nt) | 3    | 3    | 3  |
| max (Ne) | 4    | 4    | 4  |
| ICI      | 15   | 15   | 12 |
| OSI'     | 19   | 19   | 18 |
| OCI      |      | 15   | 12 |
| ORI      |      | 8    | 6  |
| OSI      |      | 23   | 18 |



Table S6 Inherent safety index of reactions for DMC synthesis

| Index    | R10-1 | R7-2 | R3 |
|----------|-------|------|----|
| Rt       | 1     | 0    | 1  |
| Rp       | 1     | 0    | 1  |
| Ry       | 1     | 2    | 1  |
| Rh       | 0     | 0    | 0  |
| IRI      | 3     | 2    | 3  |
| max (Nr) | 0     | 1    | 1  |
| max (Nf) | 4     | 3    | 4  |
| max (Nt) | 3     | 2    | 3  |
| max (Ne) | 2     | 2    | 2  |
| ICI      | 9     | 8    | 10 |
| OSI'     | 12    | 10   | 13 |
| OCI      |       | 9    | 10 |
| ORI      |       | 5    | 3  |
| OSI      |       | 14   | 13 |

Table S7 Material safety index of each reaction in the synthesis of TDI

| Materials                       | Molecular formula                                             | Nr | Flash point /°C | Nf | TLV /ppm | Nt | Explosiveness vol% | Ne |
|---------------------------------|---------------------------------------------------------------|----|-----------------|----|----------|----|--------------------|----|
| Toluene                         | C <sub>7</sub> H <sub>8</sub>                                 | 0  | 4               | 3  | 50       | 3  | 1.2~7              | 1  |
| Nitric acid                     | HNO <sub>3</sub>                                              | 0  | —               | 0  | 2        | 4  | —                  | 0  |
| Water                           | H <sub>2</sub> O                                              | 0  | —               | 0  | —        | 0  | —                  | 0  |
| Hydrogen                        | H <sub>2</sub>                                                | 0  | —               | 4  | —        | 0  | 4~75               | 4  |
| Phosgene                        | COCl <sub>2</sub>                                             | 1  | —               | 0  | 0.1      | 6  | —                  | 0  |
| Toluene diisocyanate            | C <sub>9</sub> H <sub>6</sub> N <sub>2</sub> O <sub>2</sub>   | 2  | 132             | 1  | 0.005    | 6  | 0.9~9.5            | 1  |
| Hydrochloric acid               | HCl                                                           | 0  | —               | 0  | 2        | 4  | —                  | 0  |
| Carbon monoxide                 | CO                                                            | 0  | -50             | 4  | 25       | 3  | 12.5~74.2          | 4  |
| Carbon dioxide                  | CO <sub>2</sub>                                               | 0  | —               | 0  | 5000     | 1  | —                  | 0  |
| Methanol                        | CH <sub>3</sub> OH                                            | 0  | 12              | 3  | 200      | 2  | 6~36.5             | 2  |
| Oxygen                          | O <sub>2</sub>                                                | 0  | —               | 0  | —        | 0  | —                  | 0  |
| Dimethyl carbonate              | C <sub>3</sub> H <sub>6</sub> O <sub>3</sub>                  | 1  | 17              | 3  |          | 1  | 4.22~12.87         | 1  |
| Urea                            | CON <sub>2</sub> H <sub>4</sub>                               | 0  | —               | 0  |          | 2  | —                  | 0  |
| Ammonia                         | NH <sub>3</sub>                                               | 0  | —               | 4  | 25       | 3  | 15.7~25            | 2  |
| Ionic liquid hydroxylamine      | H <sub>3</sub> NO                                             | 3  | —               | 0  |          | 1  | —                  | 0  |
| 2,4-Dinitrotoluene              | C <sub>7</sub> H <sub>6</sub> N <sub>2</sub> O <sub>4</sub>   | 3  | 155             | 1  |          | 3  | —                  | 0  |
| 2,4-Diaminotoluene              | C <sub>7</sub> H <sub>10</sub> N <sub>2</sub>                 | 1  | 149             | 1  |          | 2  | —                  | 0  |
| Dimethyl 2,4-Toluenedicarbamate | C <sub>11</sub> H <sub>14</sub> N <sub>2</sub> O <sub>4</sub> | 0  | 118             | 1  |          | 1  | —                  | 0  |

Table S8 Safety index of each reaction for TDI synthesis

| Reactions | Temperature<br>/°C | Rt | Pressure<br>/bar | Rp | Yield/ % | Ry | Reaction heat<br>/(J/g) | Rh |
|-----------|--------------------|----|------------------|----|----------|----|-------------------------|----|
| R11       | 60                 | 0  | 1                | 0  | 94       | 1  | 1059.73                 | 2  |
| R12       | 100                | 1  | 20               | 1  | 100      | 0  | 4871.05                 | 4  |
| R13       | 100                | 1  | 20               | 1  | 90       | 1  | 154.46                  | 0  |
| R14       | 70~150             | 1  | 5~25             | 1  | 90~99    | 1  | 2872.69                 | 3  |
| R15       | 70~150             | 1  | 5~25             | 1  | 90~99    | 1  | 2720.41                 | 3  |
| R16       | 70~150             | 1  | 5~25             | 1  | 90~99    | 1  | 508.43                  | 1  |
| R17       | 70~150             | 1  | 5~25             | 1  | 90~99    | 1  | 1832.68                 | 3  |
| R18       | 150~300            | 2  | 25~50            | 2  | 90~99    | 1  | 241.87                  | 1  |
| R19       | 150~300            | 2  | 25~50            | 2  | 90~99    | 1  | 302.75                  | 1  |
| R20       | 150~300            | 2  | 25~50            | 2  | 90~99    | 1  | 232.43                  | 1  |
| R21       | 70~150             | 1  | 5~25             | 1  | 90~99    | 1  | 500                     | 1  |

Table S9 Inherent safety index of reactions for TDI synthesis

| Index    | R <sub>I</sub> |     |     | R <sub>II</sub> |     |     | R <sub>III</sub> |     |    | R <sub>IV</sub> |     |     |    | R <sub>V</sub> |     |     |    | R <sub>VI</sub> |     |     |    | R <sub>VII</sub> |     |     |     | R <sub>VIII</sub> |     |  |
|----------|----------------|-----|-----|-----------------|-----|-----|------------------|-----|----|-----------------|-----|-----|----|----------------|-----|-----|----|-----------------|-----|-----|----|------------------|-----|-----|-----|-------------------|-----|--|
|          | R1             | R12 | R13 | R1              | R14 | R11 | R15              | R16 | R1 | R12             | R17 | R16 | R1 | R12            | R18 | R16 | R1 | R12             | R19 | R16 | R1 | R12              | R20 | R16 | R21 | R19               | R16 |  |
| Rt       | 0              | 1   | 1   | 0               | 1   | 0   | 1                | 1   | 0  | 1               | 1   | 1   | 0  | 1              | 1   | 1   | 0  | 1               | 1   | 1   | 0  | 1                | 1   | 1   | 1   | 1                 | 1   |  |
| Rp       | 0              | 1   | 1   | 0               | 1   | 0   | 1                | 1   | 0  | 1               | 1   | 1   | 0  | 1              | 1   | 1   | 0  | 1               | 1   | 1   | 0  | 1                | 1   | 1   | 1   | 1                 | 1   |  |
| Ry       | 1              | 0   | 1   | 1               | 1   | 1   | 1                | 1   | 1  | 0               | 1   | 1   | 1  | 0              | 1   | 1   | 1  | 0               | 1   | 1   | 1  | 0                | 1   | 1   | 1   | 1                 | 1   |  |
| Rh       | 2              | 4   | 0   | 2               | 3   | 2   | 3                | 1   | 2  | 4               | 3   | 1   | 2  | 4              | 1   | 1   | 2  | 4               | 1   | 1   | 2  | 4                | 1   | 1   | 1   | 1                 | 1   |  |
| IRI      | 3              | 6   | 3   | 3               | 6   | 3   | 6                | 4   | 3  | 6               | 6   | 4   | 3  | 6              | 4   | 4   | 3  | 6               | 4   | 4   | 3  | 6                | 4   | 4   | 4   | 4                 | 4   |  |
| max (Nr) | 3              | 3   | 2   | 3               | 3   | 3   | 3                | 2   | 3  | 3               | 1   | 2   | 3  | 3              | 1   | 2   | 3  | 3               | 1   | 2   | 3  | 3                | 1   | 2   | 3   | 1                 | 2   |  |
| max (Nf) | 3              | 4   | 1   | 3               | 4   | 3   | 4                | 3   | 3  | 4               | 4   | 3   | 3  | 4              | 3   | 3   | 3  | 4               | 3   | 3   | 3  | 4                | 4   | 3   | 3   | 3                 | 3   |  |
| max (Nt) | 4              | 3   | 6   | 4               | 6   | 4   | 3                | 6   | 4  | 3               | 3   | 6   | 4  | 3              | 2   | 6   | 4  | 3               | 2   | 6   | 4  | 3                | 3   | 6   | 3   | 2                 | 6   |  |
| max      | 1              | 4   | 1   | 1               | 4   | 1   | 4                | 2   | 1  | 4               | 4   | 2   | 1  | 4              | 2   | 2   | 1  | 4               | 2   | 2   | 1  | 4                | 2   | 2   | 1   | 2                 | 2   |  |
| ICI      | 11             | 14  | 10  | 11              | 17  | 11  | 14               | 13  | 11 | 14              | 12  | 13  | 11 | 14             | 8   | 13  | 11 | 14              | 8   | 13  | 11 | 14               | 10  | 13  | 10  | 8                 | 13  |  |
| OSI'     | 14             | 20  | 13  | 14              | 23  | 14  | 20               | 17  | 14 | 20              | 18  | 17  | 14 | 20             | 12  | 17  | 14 | 20              | 12  | 17  | 14 | 20               | 14  | 17  | 14  | 12                | 17  |  |
| OCI      |                | 14  |     |                 | 17  |     | 14               |     |    |                 | 14  |     |    |                | 14  |     |    | 14              |     |     |    | 14               |     |     |     |                   | 13  |  |
| ORI      |                | 12  |     |                 | 9   |     | 13               |     |    |                 | 19  |     |    |                | 17  |     |    | 17              |     |     |    | 17               |     |     |     |                   | 12  |  |
| OSI      |                | 26  |     |                 | 26  |     | 27               |     |    |                 | 33  |     |    |                | 31  |     |    | 31              |     |     |    | 31               |     |     |     |                   | 25  |  |

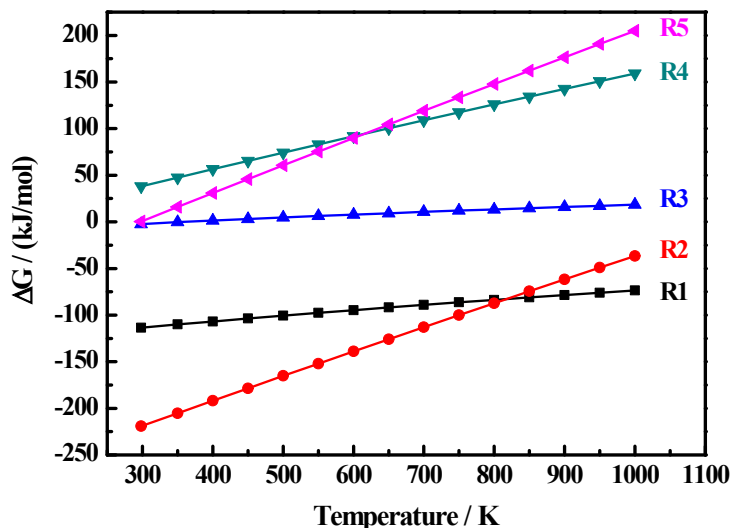

Fig. S1. The Gibbs free energy of reactions for DMC synthesis from methanol as initial raw material

R1: Phosgene process; R2: Gas-phase oxidative carbonylation of methanol by one-step process;  
 R3: Gethanol-urea alcoholysis method; R4: Methanol-CO<sub>2</sub> method;  
 R5: Methanol-propylene oxide-CO<sub>2</sub> method.

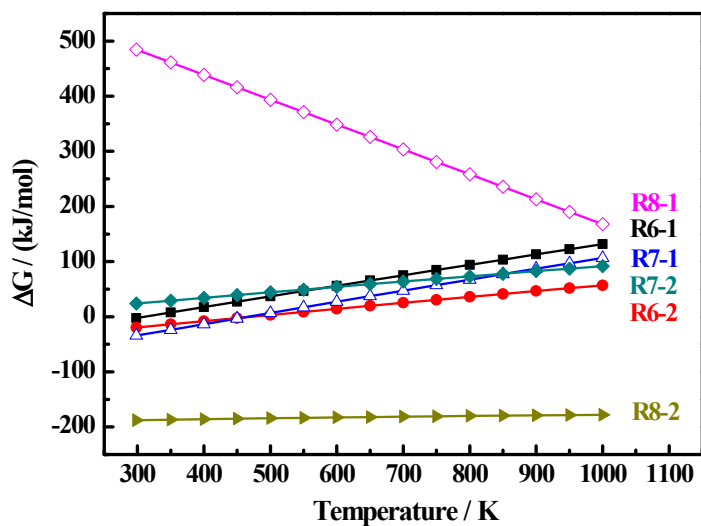

Fig. S2. The Gibbs free energy of DMC synthesis by transesterification with different epoxides as raw materials

R6-1: Ethylene oxide-CO<sub>2</sub>; R6-2: Transesterification-ethylene carbonate;  
 R7-1: Propylene oxide-CO<sub>2</sub>; R7-2: Transesterification-propylene carbonate;  
 R8-1: Cyclohexene oxide-CO<sub>2</sub>; R8-2: Transesterification-cyclohexenyl carbonate.

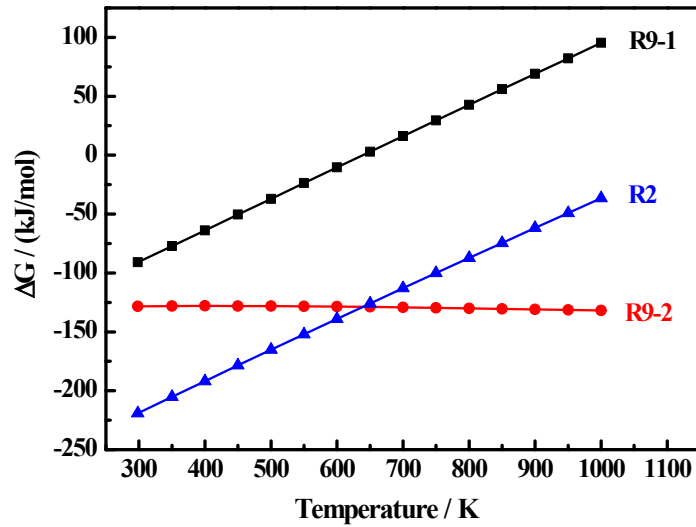

Fig. S3. The Gibbs free energy of gas-phase oxidative carbonylation of methanol to DMC

R9-1, 9-2: Gas-phase oxidative carbonylation of methanol by two-step;

R2: Gas-phase oxidative carbonylation of methanol by one-step.

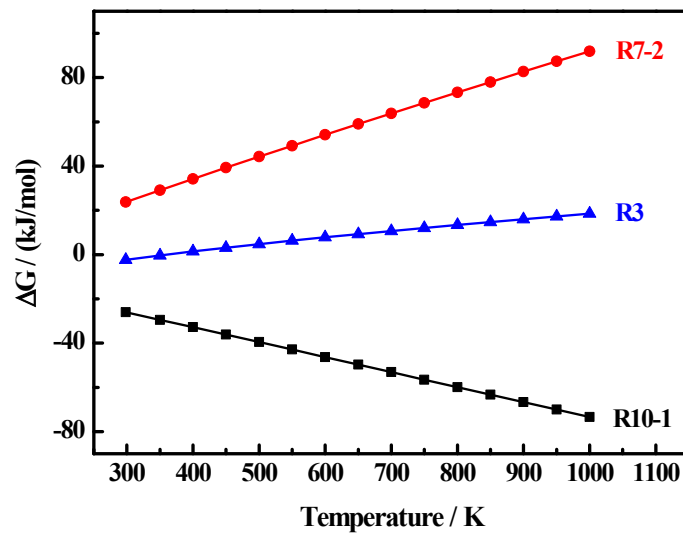

Fig. S4. The Gibbs free energy of each reaction for the synthesis of DMC

R10-1: Two-step method with propylene glycol as a circulating agent;

R7-2: Transesterification-propylene carbonate;

R3: Methanol-urea alcoholysis method.

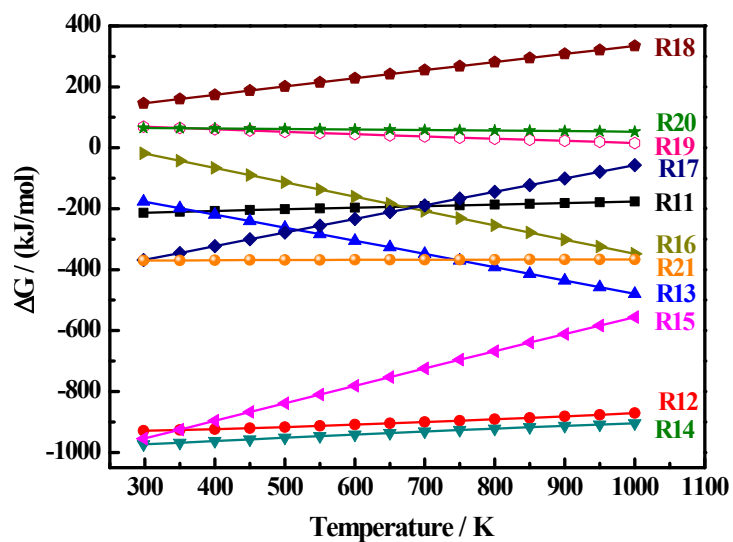

Fig. S5. The Gibbs free energy of reactions for TDI synthesis

R11: Toluene nitration; R12: Catalytic hydrogenation of 2,4-dinitrotoluene; R13: Phosgene process;

R14: Reduction carbonylation one-step method; R15: Reduction carbonylation two-step method;

R16: Catalytic decomposition of toluene dicarbamate; R17: Oxidative carbonylation method;

R18: Carbon dioxide method; R19: Dimethyl carbonate method; R20: Urea method;

R21: Dimethyl carbonate-ionic liquid hydroxylamine method.

## Symbol Description

| Symbol | Meaning                   |
|--------|---------------------------|
| Nr     | NFPA reactivity rating    |
| Nf     | Flammability              |
| Nt     | Toxicity                  |
| Ne     | Explosiveness             |
| Rt     | Temperature subindex      |
| Rp     | Pressure subindex         |
| Ry     | Yield subindex            |
| Rh     | Heat of reaction subindex |
| ICI    | Individual Chemical Index |
| IRI    | Individual Reaction Index |
| OSI'   | Individual Safety Index   |
| OCI    | Overall Chemical Index    |
| ORI    | Overall Reaction Index    |
| OSI    | Overall Safety Index      |
